# Supplementary material for: Palladium-modified cuprous(i) oxide with {100} facets for photocatalytic CO2reduction
Source: Royal Society of Chemistry journal article supplement (doi:10.1039/d0nr07703h), 2021-01-01
Supplement: d0nr07703h1.pdf [file d0nr07703h1.pdf]

# Supporting Information

## **Palladium modified cuprous (I) oxide with {100} facets for photocatalytic CO<sub>2</sub> reduction**

Xiaojing Zhang <sup>a</sup>, Xin Zhao <sup>b,c</sup>, Ke Chen <sup>a</sup>, Yingying Fan <sup>a□</sup>, Shilei Wei <sup>a</sup>, Wensheng Zhang <sup>a</sup>, Dongxue Han <sup>a,c□</sup> and Li Niu <sup>a,c</sup>

*<sup>a</sup> School of Civil Engineering c/o Center for Advanced Analytical Science, School of Chemistry and Chemical Engineering, Guangzhou University, Guangzhou 510006, P. R. China. E-mail: dxhan@gzhu.edu.cn; ccyyfan@gzhu.edu.cn*

*<sup>b</sup> State Key Laboratory of Electroanalytical Chemistry, c/o Engineering Laboratory for Modern Analytical Techniques, CAS Center for Excellence in Nanoscience, Changchun Institute of Applied Chemistry, Changchun 130022, P. R. China*

## Work function calculation

$$\Phi = E_{\text{vac}} - E_{\text{F}} \quad (1)$$

$$\chi = E_{\text{vac}} - E_{\text{CB}} \quad (2)$$

$$E_{\text{g}} = E_{\text{CB}} - E_{\text{VB}} \quad (3)$$

The calculations of work function about  $\text{Cu}_2\text{O}$  were taken by the above equations [1]. Where  $\chi$  is the semiconductor electron affinity,  $E_{\text{CB}}$  is the conduction band maximum edge potentials,  $E_{\text{VB}}$  is the valence band maximum edge potentials,  $E_{\text{F}}$  is the Fermi level, and  $E_{\text{g}}$  is the band gap. The value of the semiconductor electron affinity is 3.20 eV for  $111\text{Cu}_2\text{O}$  and 3.56 eV in  $100\text{Cu}_2\text{O}$  [2-4].  $E_{\text{g}}$  is obtained as 1.90 eV for  $100\text{Cu}_2\text{O}$  and 1.91 eV for  $111\text{Cu}_2\text{O}$  by the measurements of UV-Vis DRS (Fig. 3a). According to the valence band spectra (Fig. 3b), the energy gap between  $E_{\text{f}}$  and  $E_{\text{VB}}$  is estimated individually at about 0.23 and 0.12 eV for  $100\text{Cu}_2\text{O}$  and  $111\text{Cu}_2\text{O}$ . Thus, based on the equation (1), (2) and (3), corresponding work function of  $100\text{Cu}_2\text{O}$  and  $111\text{Cu}_2\text{O}$  is achieved as 5.23 and 4.99 eV, respectively.

## Q.E. calculation

In our experiment, QE is calculated based on *GB/T 26915-2011*. Taken 100Cu<sub>2</sub>O as sample, during the photocatalytic reaction, the irradiation area (S) is 19.63 cm<sup>2</sup>; the intensity of illumination (I) is 1.97 mW/cm<sup>2</sup>; since the Xe lamp assembled with 420 nm filter was used in our work, the equivalent incident wavelength ( $\bar{\lambda}$ ) can be considered as 584.30 nm (*GB/T 26915-2011*). Therefore, the incident photon is calculated to be  $4.10 \times 10^{20}$  quanta using the following equation:

$$N_p = (I \times S \times t) / (hc / \bar{\lambda}) = (1.97 \times 10^{-3} \times 19.63 \times 3600 \times 584.3 \times 10^{-9}) / (6.62 \times 10^{-34} \times 3 \times 10^8) = 4.10 \times 10^{20}$$

Based on the previous report [5], The reduction of CO<sub>2</sub> to CO is a two-electron transformation:

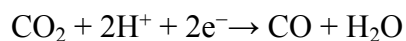

In our work, the CO yield rate of 100Cu<sub>2</sub>O is 0.04 umol/h/g (Fig. 5), thus QE of 100Cu<sub>2</sub>O can be calculated using the following equation:

$$\text{QE} = (N_{\text{CO}} \times 2) / N_p = (0.04 \times 10^{-6} \times 6.02 \times 10^{23} \times 2) / (4.10 \times 10^{20}) \approx 0.01 \%$$

Since negative pressure (-0.04 MPa) was applied in our work (Fig.S6), companying with a low initial carbon source concentration and limiting the accumulation of CO, this value is reasonable. Likewise, the QE of 100Cu<sub>2</sub>O-Pd, 111Cu<sub>2</sub>O, 111Cu<sub>2</sub>O-Pd is calculated to be 0.04%, 0.01%, 0.01%, respectively, suggesting that the loading of Pd on 100Cu<sub>2</sub>O can efficiently promote the photoreduction activity of CO<sub>2</sub>.

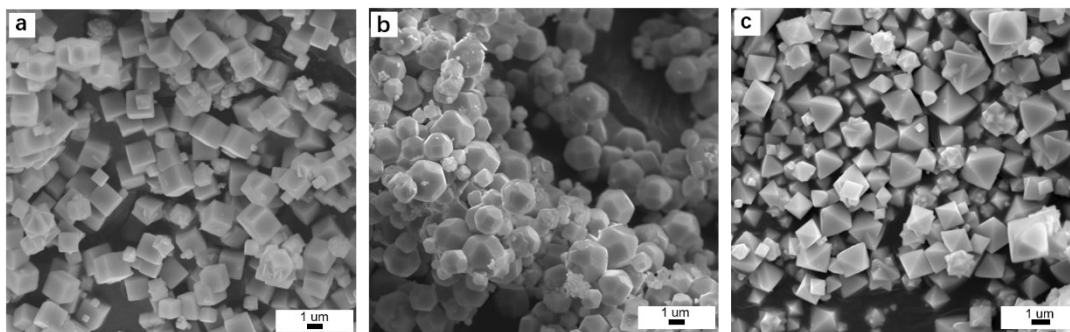

**Fig. S1** SEM images of Cu<sub>2</sub>O with different addition amounts of PVP (a) 0 g, (b) 0.2 g and (c) 1 g.

In the actual process, the influence of different PVP amounts on the synthesis of Cu<sub>2</sub>O was explored. As shown in Fig. S1, cube Cu<sub>2</sub>O was successfully prepared in the absence of PVP. When 0.2g PVP was used in the reaction, cubo-octahedron Cu<sub>2</sub>O was obtained. Moreover, octahedron Cu<sub>2</sub>O could be synthesized as the amount of PVP increases to 1.0 g.

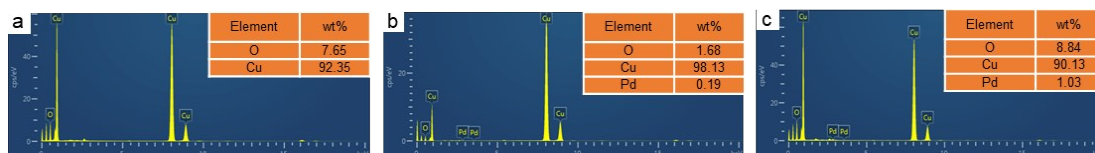

**Fig. S2** EDX of (a)  $111\text{Cu}_2\text{O}$ , (b)  $111\text{Cu}_2\text{O}-0.03\text{Pd}$  and (c)  $111\text{Cu}_2\text{O}-0.1\text{Pd}$ .

Energy dispersive X-ray (EDX) spectroscopy was used to explore the loading amount of Pd. As shown in Fig. S2, with the increase of additional  $\text{K}_2\text{PdCl}_4$ , the weight ratio of Pd raises from 0 (Fig. S2a), 0.18 (Fig. S2b) to 1.03 wt% (Fig. S2c) for  $111\text{Cu}_2\text{O}$  (Fig. 1c),  $111\text{Cu}_2\text{O}-0.03\text{Pd}$  (Fig. S4b) and  $111\text{Cu}_2\text{O}-0.1\text{Pd}$  (Fig. 1f). The prominent promotion in mass ratio of Pd is consistent with the amount display in SEM images confirming that the loaded species on the surface of  $100\text{Cu}_2\text{O}$  should be Pd nanoparticle.

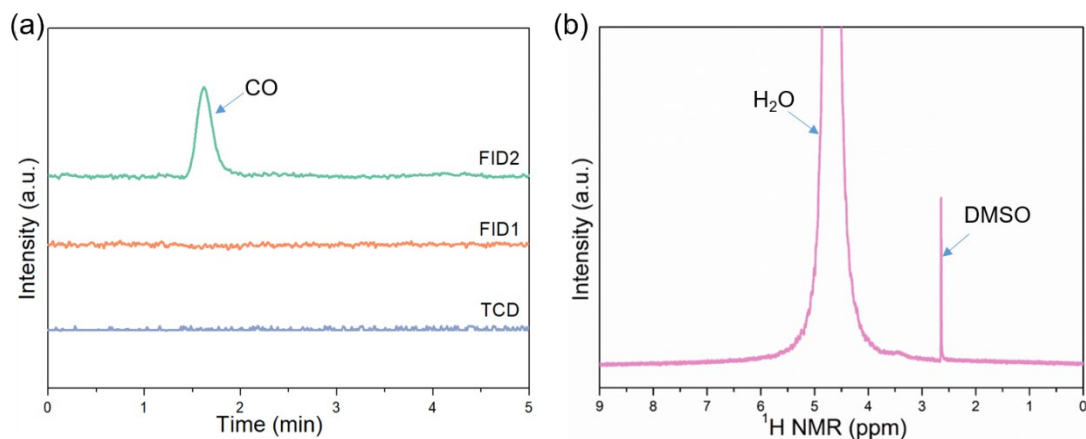

**Fig. S3** (a) Gas chromatography and (b)  $^1\text{H}$  NMR detection over  $100\text{Cu}_2\text{O}-0.1\text{Pd}$  after 2h photoreduction of  $\text{CO}_2$

The photocatalytic products of  $\text{CO}_2$  reduction were detected by gas chromatography (GC) and nuclear magnetic resonance (NMR).  $\text{H}_2$  as a possible gas product was evaluated by using the thermal conductivity detector (TCD) of GC equipped with packed column of  $5\text{A } \Phi 3 \text{ mm} \times 3 \text{ m}$ . And other possible gas products including  $\text{CO}$  and  $\text{CH}_4$  were estimated by the utilization of flame ionization detector (FID2) of GC assembled with packed column of  $\text{GDN}-502 \Phi 3 \text{ mm} \times 4 \text{ m}$ . The possible liquid products including formic acid, methanol and ethanol were assessed by the flame ionization detector (FID1) of gas chromatograph, which is equipped with capillary column of  $\text{SE}-54 \Phi 0.32 \text{ mm} \times 50 \text{ m}$ . The detection results were illustrated in Fig. S3a and there is only a peak of FID2 was observed, indicating there is absence of  $\text{H}_2$ , formic acid and methanol, ethanol. According to the standard substance, the observed peak in FID2 is ascribed to  $\text{CO}$ .  $^1\text{H}$  NMR was also taken to further define the liquid product and recorded on Fig. S3b. Only two peaks which represented a signal of  $\text{H}_2\text{O}$  and internal standard (dimethyl sulfoxide, DMSO) were detected, indicating no  $\text{CH}_3\text{OH}$  ( $\delta = 3.28 \text{ ppm}$ ) and  $\text{HCOOH}$  ( $\delta = 8.30 \text{ ppm}$ ) as liquid products were generated. These results suggest that the discoverable product of  $\text{CO}_2$  photoreduction over  $100\text{Cu}_2\text{O}-\text{Pd}$  is only carbon monoxide.

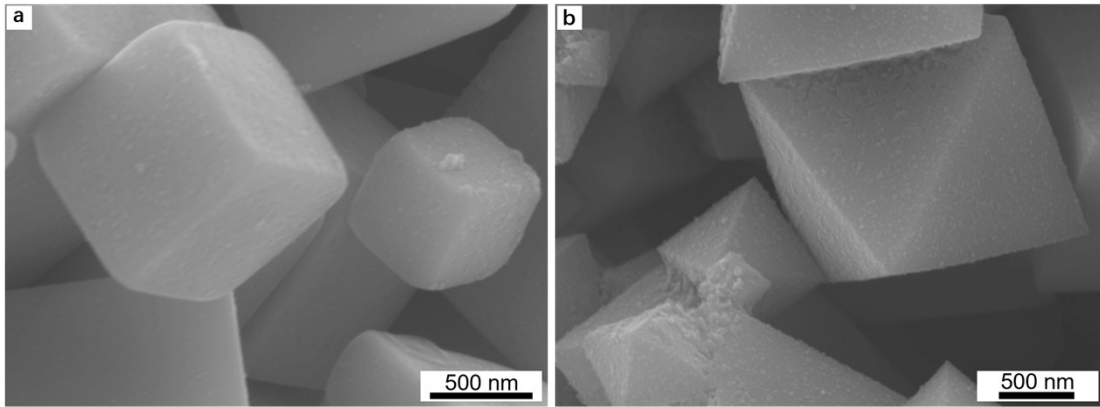

**Fig. S4** SEM images of 100Cu<sub>2</sub>O-0.30Pd and (b) 111Cu<sub>2</sub>O-0.01Pd.

Fig. S4 shows the SEM images of Cu<sub>2</sub>O covered with 3 wt% Pd, where 1 mL K<sub>2</sub>PdCl<sub>4</sub> was used in this synthesis process.

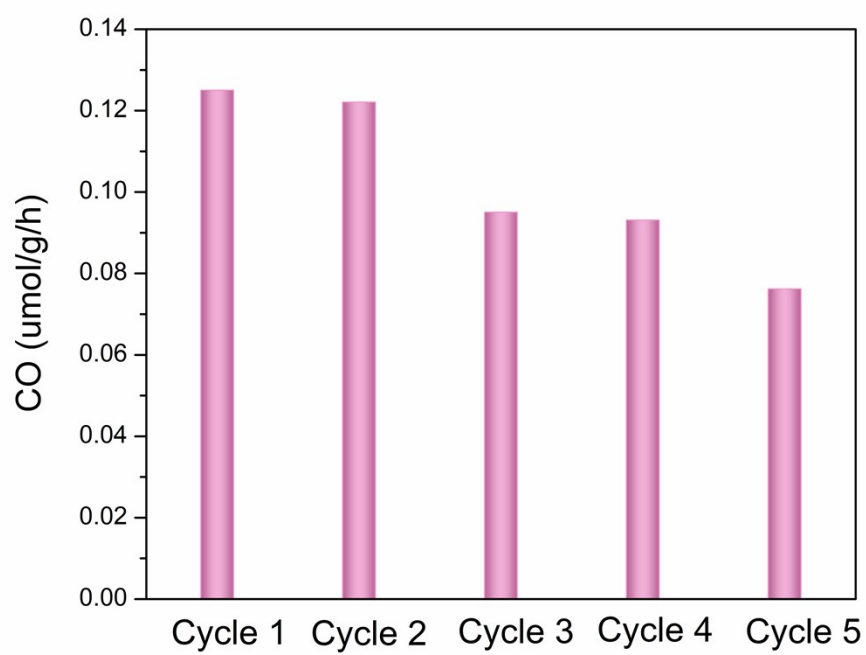

**Fig. S5** Cycle experiments of photocatalytic reduction of CO<sub>2</sub> over 100Cu<sub>2</sub>O-0.1Pd



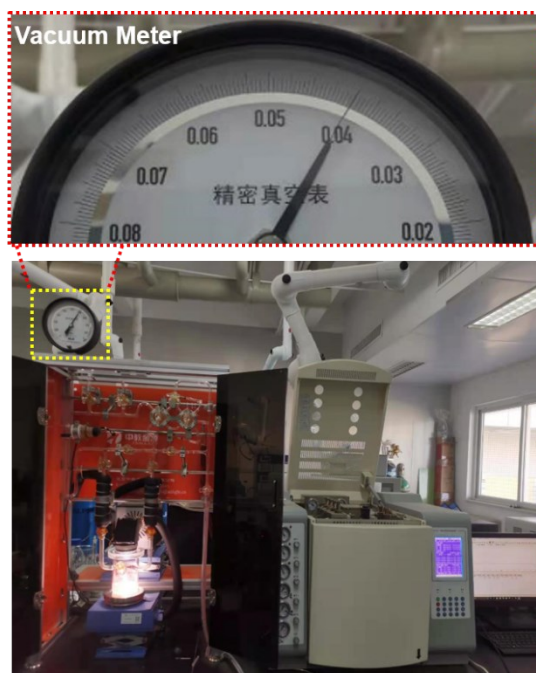

**Fig. S6** the reaction pressure in actual experiment.

Based on the previous reports [6-7], the poison effect of CO might cause 90% performance decline in catalytic reaction within 0.5 h, namely the catalyst is basically deactivated. However, in our work, a relative stable photocatalytic performance is observed, where the yield of CO demonstrates only 2% decrease (Fig. S5) after first cycle (4 h reaction time). This performance decline is likely attributed to the mass loss of catalyst [8]. Therefore, it should be speculated that no distinct poison effect of CO exists in our system. Here, two aspects are provided as probable explanations. The first should be the negative pressure reaction condition. The whole photocatalytic reaction was performed under -0.04 MPa pressure of CO<sub>2</sub> atmosphere, which is beneficial for the products escaping from the aqueous solution and entering into the online GC detection (Fig. S6). Thus, the generated CO can be promptly extracted from the surface of catalyst in aqueous solution avoiding its poison effect. The second should be the active site location. Since Cu<sub>2</sub>O is a p-type semiconductor, according to the energy band matching between 100Cu<sub>2</sub>O and Pd, the photoholes as major charge carrier migrate from the valence band of 100Cu<sub>2</sub>O to Pd leaving photoelectrons for CO<sub>2</sub> reduction on the surface of 100Cu<sub>2</sub>O. Thus, the active site is located on the surface of Cu<sub>2</sub>O rather than Pd, which further inhibits the poison effect for Pd by CO.

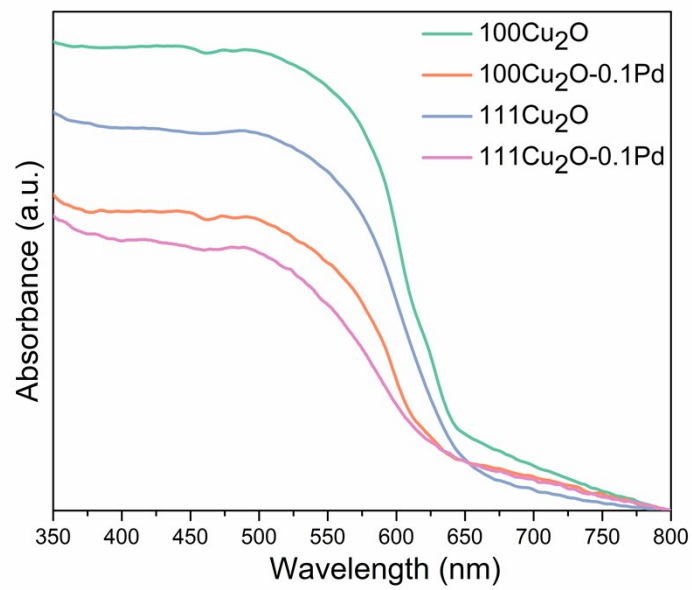

**Fig. S7** UV-Vis diffuse reflectance spectra of 100Cu<sub>2</sub>O, 111Cu<sub>2</sub>O, 100Cu<sub>2</sub>O-0.1Pd and 111Cu<sub>2</sub>O-0.1Pd.

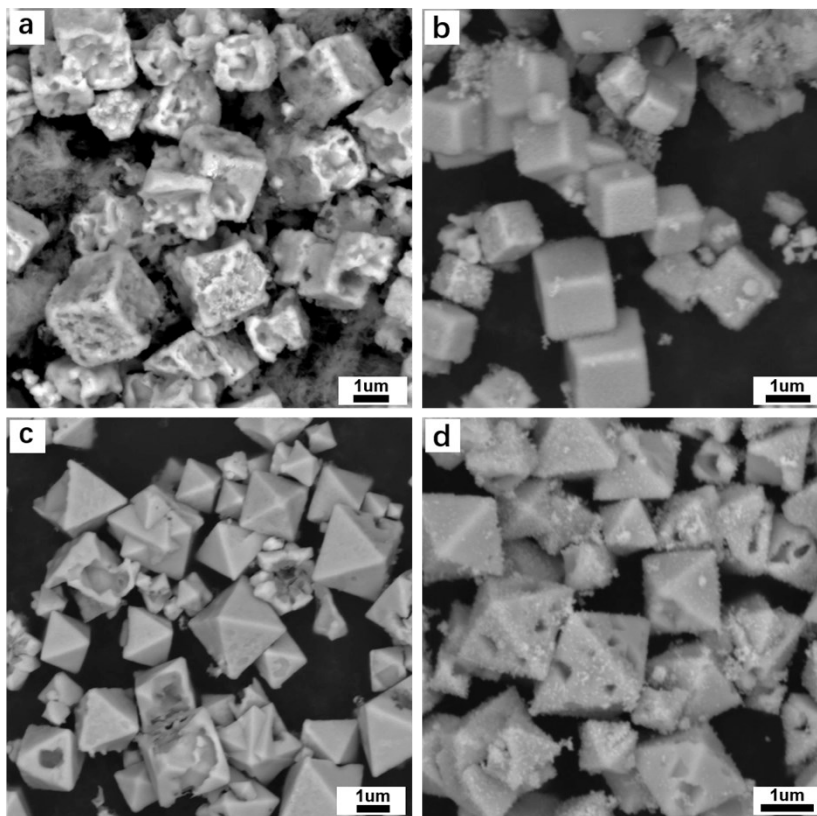

**Fig. S8** SEM images of (a) 100Cu<sub>2</sub>O, (b) 100Cu<sub>2</sub>O-0.1Pd, (c) 111Cu<sub>2</sub>O and (d) 111Cu<sub>2</sub>O-0.1Pd after photoreduction of CO<sub>2</sub>.

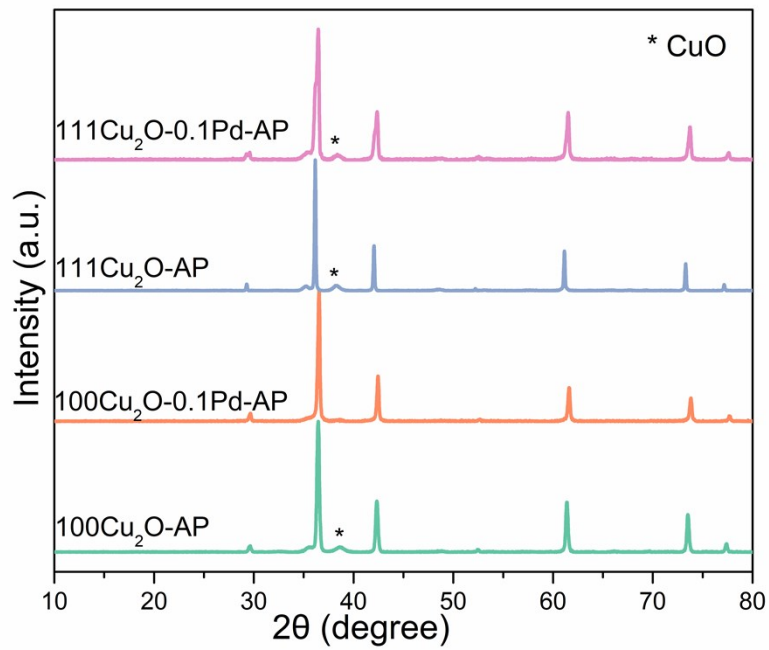

**Fig. S9** XRD patterns of 100Cu<sub>2</sub>O, 111Cu<sub>2</sub>O, 100Cu<sub>2</sub>O-0.1Pd and 111Cu<sub>2</sub>O-0.1Pd after photoreduction of CO<sub>2</sub>.

**TableS1.** The binding energy of Cu 2p, O 1s, Pd 3d from XPS spectrum over 100Cu<sub>2</sub>O, 111Cu<sub>2</sub>O, 100Cu<sub>2</sub>O-0.1Pd and 111Cu<sub>2</sub>O-0.1Pd

| Samples                              | Binding Energy (eV) |                                        |              |                |                 |                  |
|--------------------------------------|---------------------|----------------------------------------|--------------|----------------|-----------------|------------------|
|                                      | Cu 2p               |                                        | O 1s         |                | Pd 3d           |                  |
|                                      | Cu <sup>+</sup>     | Cu <sup>2+</sup>                       | Lattice<br>O | Absorbed<br>O  | Pd <sup>0</sup> | Pd <sup>2+</sup> |
| <b>100Cu<sub>2</sub>O</b>            | 931.9;<br>951.8     | 933.4; 953.4<br>942.5; 962.1           | 529.8        | 531.1          |                 |                  |
| <b>100Cu<sub>2</sub>O-<br/>0.1Pd</b> | 931.8;<br>951.7     | 933.7; 953.6<br>941.3; 961.8;<br>943.7 | 529.3        | 530.8<br>533.0 | 335.0;<br>340.3 | 336.1;<br>341.4  |
| <b>111Cu<sub>2</sub>O</b>            | 931.6;<br>951.5     | 933.4; 953.4<br>942.6; 962.1           | 529.6        | 530.5          |                 |                  |
| <b>111Cu<sub>2</sub>O-<br/>0.1Pd</b> | 931.6;<br>951.4     | 933.5; 953.3<br>941.8; 961.8           | 529.7        | 530.8<br>532.1 | 334.8;<br>340.1 | 336.7;<br>342.2  |

**Table.S2** The Multi-point BET and CO<sub>2</sub> adsorption of 100Cu<sub>2</sub>O, 111Cu<sub>2</sub>O, 100Cu<sub>2</sub>O-0.1Pd and 111Cu<sub>2</sub>O-0.1Pd

| <b>Sample</b>              | <b>SBET<br/>(m<sup>2</sup>g<sup>-1</sup>)</b> | <b>CO<sub>2</sub> adsorption<br/>(cc/g)</b> |
|----------------------------|-----------------------------------------------|---------------------------------------------|
| 100Cu <sub>2</sub> O       | 3.84                                          | 0.255                                       |
| 100Cu <sub>2</sub> O-0.1Pd | 362.88                                        | 18.843                                      |
| 111Cu <sub>2</sub> O       | 2.22                                          | 1.955                                       |
| 111Cu <sub>2</sub> O-0.1Pd | 461.66                                        | 25.641                                      |

## References

- [1] Cendula, P.; Tilley, S. D.; Gimenez, S.; Bisquert, J.; Schmid, M.; Grätzel, M.; Schumacher, J. O., Calculation of energy band diagram of a photoelectrochemical water splitting cell. *J. Phys. Chem. C.*, 2014, 118, 51, 29599–29607.
- [2] Chu, C. Y.; Huang, M. H., Facet-dependent photocatalytic properties of Cu<sub>2</sub>O crystals probed by using electron, hole and radical scavengers. *J. Mater. Chem. A*, 2017, 5, 15116–15123
- [3] Balamurugan, B.; Aruna, I.; Mehta, B. R., Size-dependent conductivity-type inversion in Cu<sub>2</sub>O nanoparticles. *Phys. Rev. B.*, 2004, 69, 165419-165424.
- [4] Tan, C. S.; Hsu, S. C.; Ke, W. H.; Chen, L. J.; Huang, M. H., Facet-dependent electrical conductivity properties of Cu<sub>2</sub>O crystals. *Nano. Lett.*, 2015, 15, 2155-2160.
- [5] Maeda, K., Metal-complex/semiconductor hybrid photocatalysts and photoelectrodes for CO<sub>2</sub> reduction driven by visible light. *Adv. Mater.*, 2019, 31, 1808205-1808242.
- [6] Min, X. Q.; Kanan, M. W., Pd-catalyzed electrohydrogenation of carbon dioxide to formate: high mass activity at low overpotential and identification of the deactivation pathway. *J. Am. Chem. Soc.*, 2015, 137, 4701-4708.
- [7] Wang, J. Y.; Zhang, H. X.; Jiang, K.; Cai, W. B., From HCOOH to CO at Pd electrodes: a surface-enhanced infrared spectroscopy study. *J. Am. Chem. Soc.*, 2011, 133, 14876-14879.
- [8] Aguirre, M. E.; Zhou, R.; Eugene, A. J.; Guzman, M. I.; Grela, M. A., Cu<sub>2</sub>O/TiO<sub>2</sub> heterostructures for CO<sub>2</sub> reduction through a direct Z-scheme: Protecting Cu<sub>2</sub>O from photocorrosion. *Appl. Catal. B*, 2017, 217, 485-493.
